# Supplementary material for: Food security and livelihoods of post-resettlement households around Kanha National Park
Source: PLOS journal article supplement (doi:10.1371/journal.pone.0243825), 2020-12-28

## 8(a). Variable Names as used in modelling

| Variable Name | Explanation / Longer name                                                                 |
|---------------|-------------------------------------------------------------------------------------------|
| adn           | Number of adults                                                                          |
| asset         | Asset index score                                                                         |
| cattle        | Heads of cattle                                                                           |
| chn           | Number of children                                                                        |
| dc            | Number of children suffering diarrhoea                                                    |
| dd            | Number of days child spent suffering diarrhoea                                            |
| dte           | Distance to KNP core area - Euclidean measured in QGIS                                    |
| edu           | Education level - highest in household                                                    |
| fc            | Number of children suffering fever                                                        |
| fd            | Number of days children spent suffering fever                                             |
| ffc           | Forest food count                                                                         |
| fwd           | Fuel Wood distance - reported by respondent on survey                                     |
| fwt           | Fuel Wood time taken - reported by respondent on survey                                   |
| gdiv          | Number of types of veg grown in garden                                                    |
| goat          | Number of goats                                                                           |
| hen           | Number of hens                                                                            |
| ht            | House material - mud / brick+concrete / mixed                                             |
| jps           | Job profile: income sources (labour / agriculture / cattle / salaried job / poultry etc.) |
| kero          | Kerosene as cooking fuel yes / no                                                         |
| killn         | Number of livestock killed by large carnivore                                             |
| land          | Land owned                                                                                |
| lpg           | LPG as cooking fuel yes / no                                                              |
| midday        | Number of days children sent to midday meals at school                                    |
| mkt           | Distance to market - Euclidean measured in QGIS                                           |
| ov            | Origin village                                                                            |
| pcr           | % crop raided by animals                                                                  |
| pig           | Number of pigs                                                                            |
| rd            | Distance to road - Euclidean measured in QGIS                                             |
| reln          | Number of relatives in the village                                                        |
| resi          | Time in months since resettlement                                                         |
| rft           | Number of resettled families from KNP in the same village                                 |
| ricec         | % rice crop consumed annual                                                               |
| ricek         | % rice crop stored annual                                                                 |
| rices         | % rice crop sold annual                                                                   |
| riv           | Distance to river - Euclidean measured in QGIS                                            |
| shock         | Incidence of shock event in the last year (death of family member / natural calamity)     |
| soilf         | Soil fertility perception as reported by land owner                                       |
| soilw         | Water retention capacity of land owned                                                    |
| teh           | Tehsil                                                                                    |
| tendu         | Number of people * number of days tendu collection effort                                 |
| wheatc        | % wheat crop consumed annual                                                              |
| wheatk        | % wheat crop stored annual                                                                |
| wheats        | % wheat crop sold annual                                                                  |
| winterct      | Winter crop type count                                                                    |
| wppl          | Number of people collecting water for household                                           |

### 8 (b). Variables used in models correlation matrix

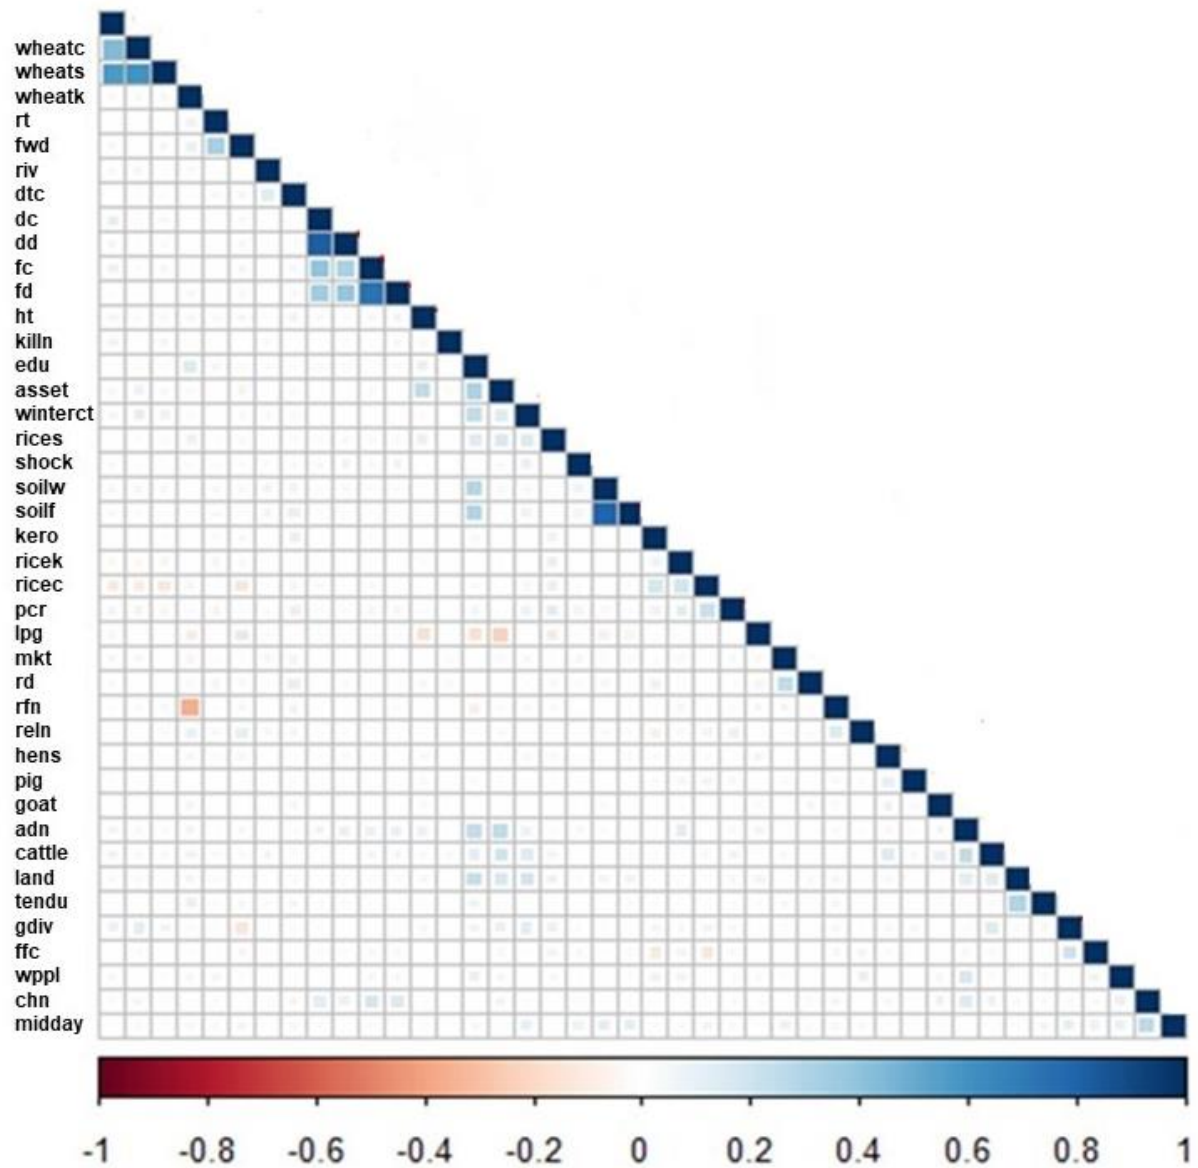

Supplement: S8 (10.1371/journal.pone.0243825.s008) [file journal.pone.0243825.s008]
