# Supplementary material for: Food security and livelihoods of post-resettlement households around Kanha National Park
Source: PLOS journal article supplement (doi:10.1371/journal.pone.0243825), 2020-12-28

#### 4. VARIABLES USE IN PCA (FIG 3c)

| <b>Variable as per<br/>(Census 2011)</b>                                         | <b>Mean for surveyed<br/>villages</b> | <b>Mean for all villages in<br/>study extent</b> | <b>P-value</b> |
|----------------------------------------------------------------------------------|---------------------------------------|--------------------------------------------------|----------------|
| total village area (area)                                                        | 369.47                                | 335.47                                           | 0.18           |
| forest land (forest)                                                             | 63.67                                 | 66.04                                            | 0.83           |
| unirrigated land (unirr)                                                         | 165.79                                | 204.93                                           | 0.37           |
| presence of national<br>highway (NH=1 when<br>present at village, 2 when<br>not) | 1.94                                  | 1.92                                             | 0.46           |
| presence of state highway<br>(SH=1 when present at<br>village, 2 when not)       | 1.91                                  | 1.85                                             | 0.04           |
| distance to nearest town<br>(towndist)                                           | 22.75                                 | 20.82                                            | 0.36           |

**Density graphs of variables used in PCA showing considerable overlap (green) between surveyed villages (blue) and all villages in study extent (yellow) (Fig. 3(c)).** The variables we used to run this PCA were: total village area (area), forest land (forest), unirrigated land (unirr), presence of national highway (NH=1), presence of state highway (SH=1) and distance to nearest town (towndist).

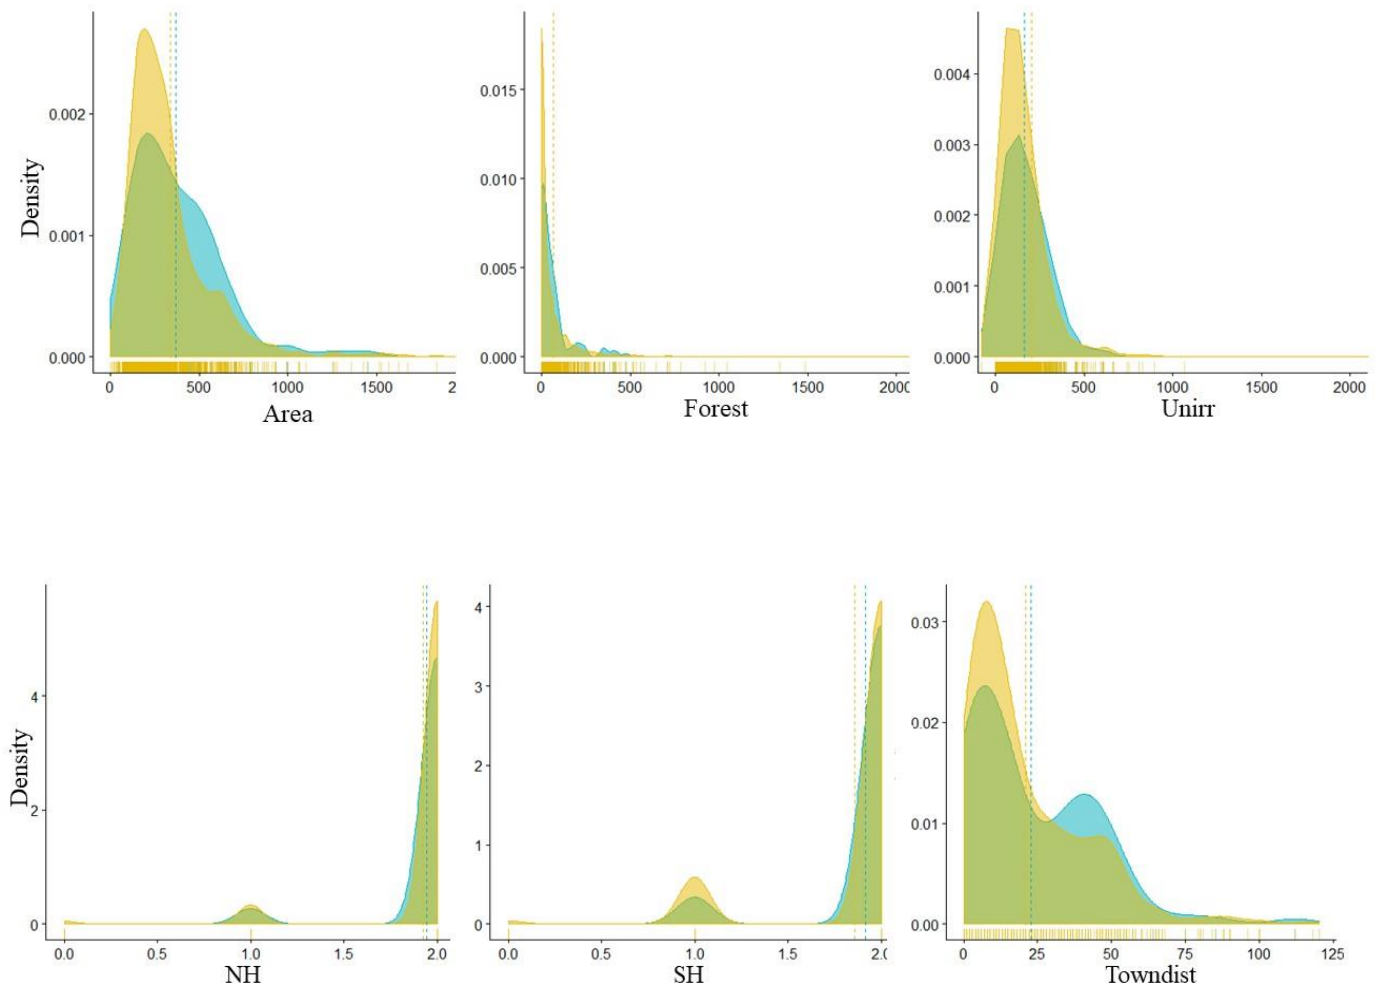

Supplement: S4 (10.1371/journal.pone.0243825.s004) [file journal.pone.0243825.s004]
